# Supplementary material for: Promoting Zn2+ storage capability of a vanadium-based cathode via structural reconstruction for aqueous Zn-ion batteries
Source: Royal Society of Chemistry journal article supplement (doi:10.1039/d1ta08305h), 2021-01-01
Supplement: d1ta08305h1.pdf [file d1ta08305h1.pdf]

## Promoting Zn<sup>2+</sup> Storage Capability of Vanadium-based Cathode via Structural Reconstruction for Aqueous Zn-ion Battery

Yi Wang, Lijun Zhou, Xianshuo Cao, Xingyuan Gao,\* and Xihong Lu\*

### Calculations:

The specific capacity  $C$  of the as-fabricated battery was calculated by the following formula with the discharge curve:

$$C = \frac{\int_0^{\Delta t} I \times dt}{m} \quad (1)$$

Where  $C$  (mAh g<sup>-1</sup>) is the specific capacity,  $I$  (mA) is the actual discharging current,  $\Delta t$  (h) is the discharged time and  $m$  (mg) is the mass loading of the electrode.

The energy density  $E$  and power density  $P$  of the battery were numerated (or calculated) with the following equations:

$$E = C \times \Delta V \quad (2)$$

$$P = \frac{C \times \Delta V}{1000 \times \Delta t} \quad (3)$$

Where  $E$  (Wh kg<sup>-1</sup>) is the energy density,  $C$  (mAh g<sup>-1</sup>) is the mass capacity obtained from Equation (1) and  $\Delta V$  (V) is the voltage.  $P$  (kW kg<sup>-1</sup>) is the specific power density and  $\Delta t$  (h) is the discharged time.

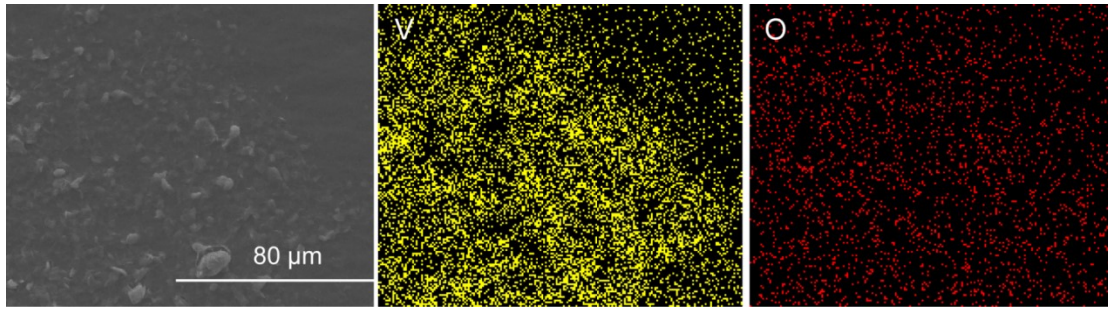

**Figure S1.** SEM selected-area elemental mapping images of VO sample.

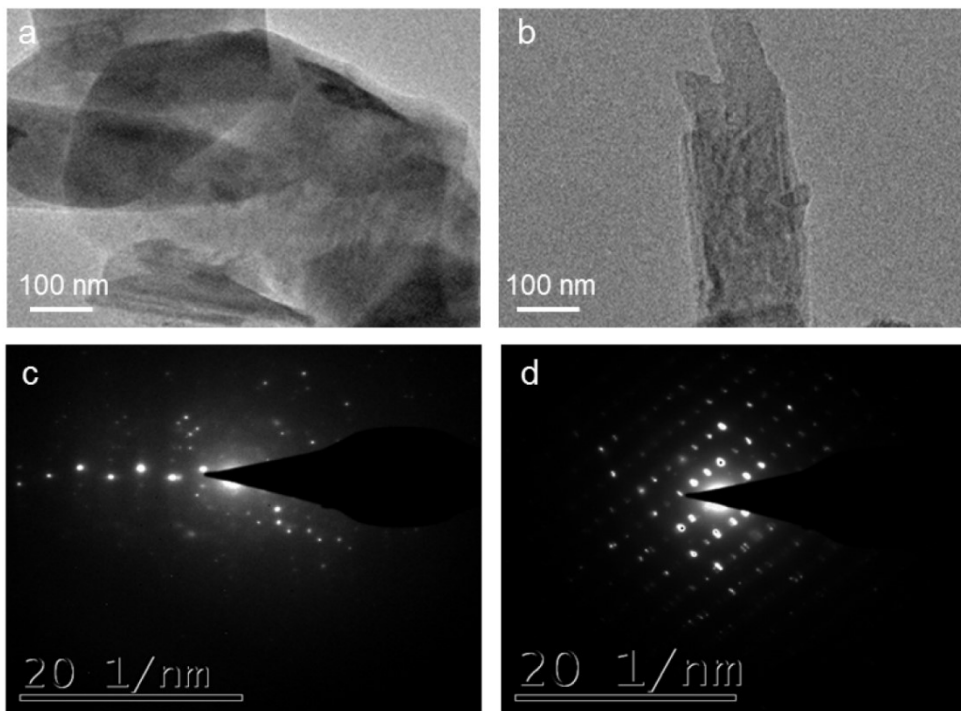

**Figure S2.** TEM images of (a) VO and (b) VOHO samples. The corresponding SAED patterns of (c) VO and (d) VOHO sample.

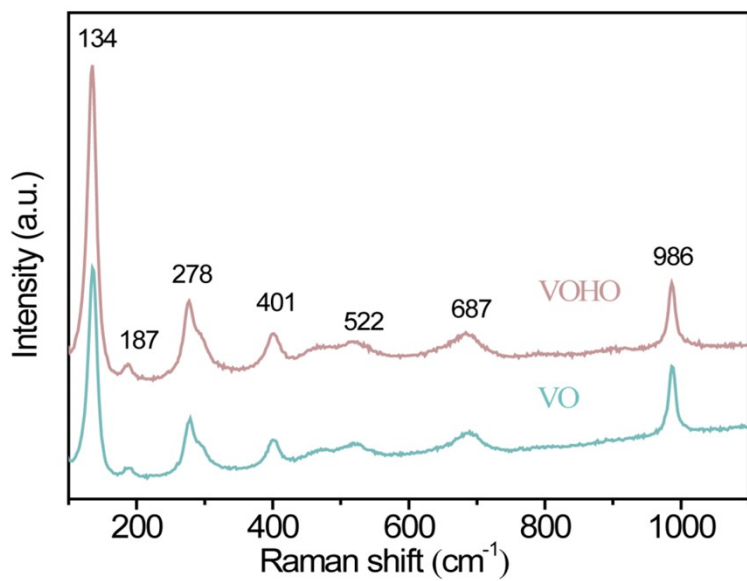

**Figure S3.** Raman spectra of VO and VOHO sample.

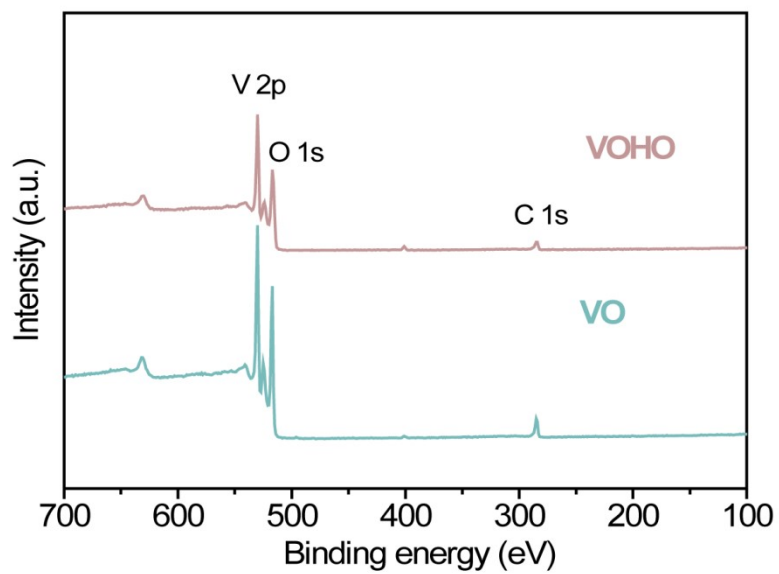

**Figure S4.** XPS survey spectrum of VO and VOHO sample.

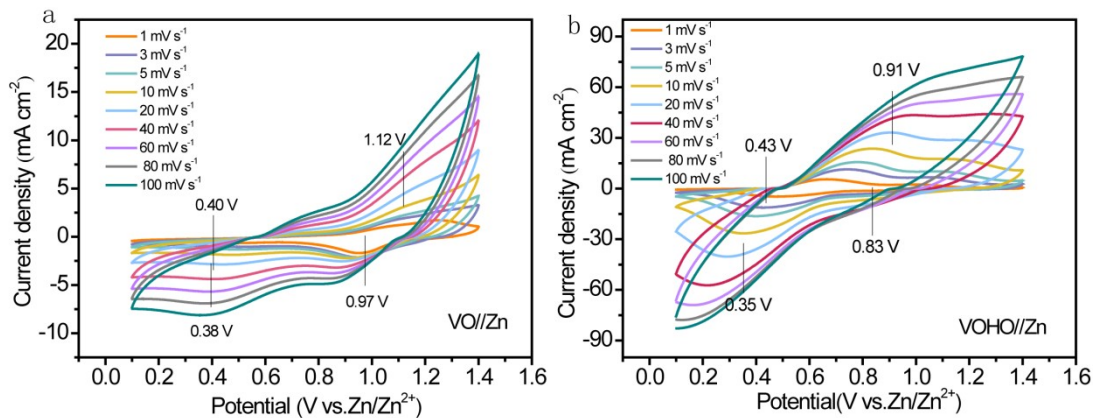

**Figure S5.** CV curves at different scan rates of (a) VO//Zn and (b) VOHO//Zn.

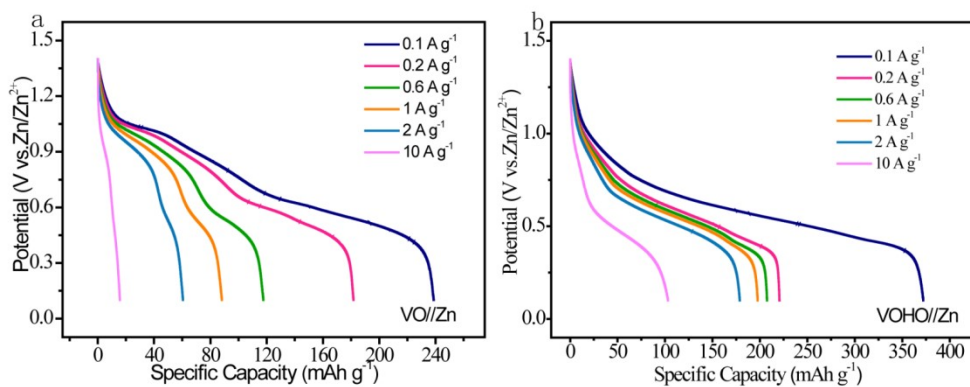

**Figure S6.** GCD curves at different current densities of (a) VO//Zn and (b) VOHO//Zn.

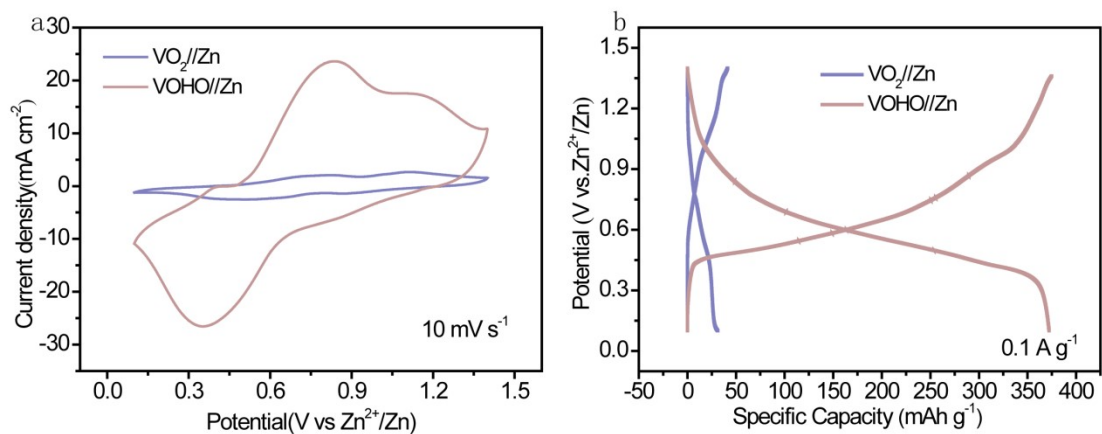

**Figure S7.** (a) CV curves at  $10 \text{ mV s}^{-1}$  and (b) GCD curves at  $0.1 \text{ mA cm}^{-2}$  of VO<sub>2</sub>//Zn and VOHO//Zn batteries.

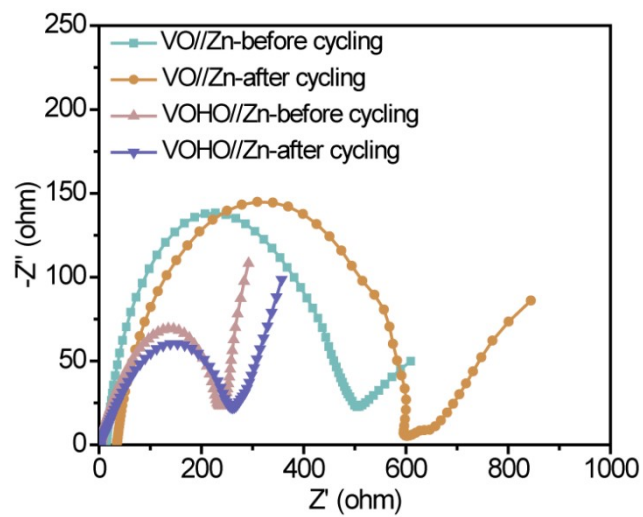

**Figure S8.** The EIS spectra of VO//Zn and VOHO//Zn batteries before and after cycles.
